# Supplementary material for: Ultrasound-Assisted Nanoemulsion Loaded with Optimized Antibacterial Essential Oil Blend: A New Approach against Escherichia coli, Staphylococcus aureus, and Salmonella Enteritidis in Trout (Oncorhynchus mykiss) Fillets
Source: MDPI journal article supplement (doi:10.3390/foods13101569), 2024-05-17
Supplement: s1 [file s1]

**Supplementary Table S1.** Bacterial count of rainbow trout (*Oncorhynchus mykiss*) fillets coated with nanoemulsions containing optimized essential oil (EO) blend<sup>ε</sup> and stored at 4 ± 1°C for 9 days.

| <i>Escherichia coli</i>       |             |             |             |             |
|-------------------------------|-------------|-------------|-------------|-------------|
| Treatments*                   | Day 0       | Day 3       | Day 6       | Day 9       |
| Control                       | 6.91 ± 0.38 | 6.80 ± 0.09 | 6.93 ± 0.11 | 6.98 ± 0.13 |
| NE <sub>0.5</sub>             | 6.97 ± 0.83 | 7.08 ± 0.16 | 7.02 ± 0.12 | 7.03 ± 0.06 |
| NE <sub>1</sub>               | 7.22 ± 0.47 | 6.94 ± 0.12 | 7.13 ± 0.12 | 6.90 ± 0.38 |
| NE <sub>2</sub>               | 7.23 ± 0.17 | 6.84 ± 0.08 | 6.85 ± 0.06 | 6.88 ± 0.31 |
| <i>Staphylococcus aureus</i>  |             |             |             |             |
| Treatments                    | Day 0       | Day 3       | Day 6       | Day 9       |
| Control                       | 6.45 ± 0.19 | 5.46 ± 0.08 | 6.18 ± 0.15 | 7.25 ± 0.04 |
| NE <sub>0.5</sub>             | 6.41 ± 0.07 | 6.05 ± 0.10 | 6.32 ± 0.09 | 7.13 ± 0.01 |
| NE <sub>1</sub>               | 6.23 ± 0.18 | 6.11 ± 0.07 | 6.20 ± 0.02 | 6.99 ± 0.04 |
| NE <sub>2</sub>               | 6.30 ± 0.16 | 5.95 ± 0.18 | 5.67 ± 1.02 | 7.03 ± 0.04 |
| <i>Salmonella</i> Enteritidis |             |             |             |             |
| Treatments                    | Day 0       | Day 3       | Day 6       | Day 9       |
| Control                       | 6.67 ± 0.17 | 6.89 ± 0.04 | 6.97 ± 0.15 | 7.00 ± 0.19 |
| NE <sub>0.5</sub>             | 6.58 ± 0.18 | 6.94 ± 0.11 | 6.95 ± 0.11 | 6.88 ± 0.36 |
| NE <sub>1</sub>               | 6.69 ± 0.07 | 6.72 ± 0.16 | 6.91 ± 0.09 | 6.71 ± 0.30 |
| NE <sub>2</sub>               | 6.82 ± 0.11 | 6.65 ± 0.12 | 6.85 ± 0.09 | 6.60 ± 0.06 |

Results are expressed as the mean ± standard deviation ( $n = 3$ ). \*Control (absence of antioxidant); NE<sub>0.5</sub> (0.5% of the optimized blend nanoemulsion); NE<sub>1</sub> (1% of the optimized blend nanoemulsion); NE<sub>2</sub> (2% of the optimized blend nanoemulsion). <sup>ε</sup>Optimized EO blend was composed of oregano (*Origanum vulgare*), thyme (*Thymus vulgaris*), and lemongrass (*Cymbopogon citratus*) at 50%, 40%, and 10%, respectively.
